# Supplementary material for: Factors Associated with COVID-19 Infection, Hospitalization and Death in New York City Neighborhoods
Source: PubMed Central journal article supplement — Innov Pharm. 2021 Jun 10;12(3):10.24926/iip.v12i3.3379. doi: 10.24926/iip.v12i3.3379 (PMC9120001; doi:10.24926/iip.v12i3.3379), 2021-06-10

**Table 2. Sociodemographic characteristics and health outcomes in New York City communities with high rates of confirmed COVID-19 cases, May 2020**

| Neighborhood                  | Borough       | Case rate | Positive rate | Death rate | Median age | Male % | Black % | Hispanic % | White % | Foreign born % | Without college degree % | Poverty % | Uninsured % | Obesity % | Diabetes % | Hypertension % | death <sup>†</sup> | Hospitalization <sup>§</sup> |
|-------------------------------|---------------|-----------|---------------|------------|------------|--------|---------|------------|---------|----------------|--------------------------|-----------|-------------|-----------|------------|----------------|--------------------|------------------------------|
| Premature Avoidable           |               |           |               |            |            |        |         |            |         |                |                          |           |             |           |            |                |                    |                              |
| Jackson Heights               | Queens        | 39.4      | 44.3*         | 3.2*       | 35.9       | 53.5   | 6       | 64*        | 11      | 60*            | 73*                      | 25*       | 28*         | 20        | 13         | 29             | 120.9              | 869                          |
| Elmhurst and Corona           | Queens        | 36.0      | 44.9*         | 3.1*       | 32.8       | 52.1   | 5       | 51*        | 6       | 63*            | 72*                      | 27*       | 25*         | 23        | 14         | 27             | 105.2              | 892                          |
| Riverdale and Fieldston       | Bronx         | 35.8      | 25.5          | 3.1*       | 44.3*      | 45.0   | 12      | 47*        | 34      | 34             | 55*                      | 15        | 8           | 24        | 12         | 28             | 170.4              | 1250                         |
| Williamsbridge and Baychester | Bronx         | 35.4      | 39.9*         | 3.2*       | 36.2       | 45.5   | 65*     | 25         | 6       | 40             | 68*                      | 23        | 8           | 30        | 14         | 39*            | 202.3              | 1891*                        |
| Throggs Neck and Co-op City   | Bronx         | 35.1      | 33.2          | 2.5*       | 43.1*      | 45.2   | 23      | 40         | 30      | 21             | 66*                      | 14        | 7           | 24        | 13         | 37*            | 183.3              | 1185                         |
| Queens Village                | Queens        | 32.1      | 41.0*         | 1.9        | 39.4*      | 46.7   | 56*     | 12         | 12      | 42             | 62*                      | 13        | 11          | 27        | 14         | 37*            | 117.3              | 1084                         |
| Morris Park and Bronxdale     | Bronx         | 31.7      | 39.2*         | 2.7*       | 32.8       | 47.0   | 21      | 45*        | 24      | 35             | 68*                      | 21        | 12          | 32*       | 14         | 31             | 206.9              | 1613                         |
| Rockaway and Broad Channel    | Queens        | 31.3      | 37.6*         | 3.8*       | 35.4       | 47.1   | 40*     | 22         | 33      | 26             | 65*                      | 18        | 11          | 32*       | 15*        | 34*            | 269.3*             | 1345                         |
| Mott Haven and Melrose        | Bronx         | 29.9      | 36.1          | 2.6*       | 30.6       | 46.3   | 24      | 73*        | 1       | 30             | 84*                      | 29*       | 14*         | 42*       | 20*        | 38*            | 302*               | 3138*                        |
| Parkchester and Soundview     | Bronx         | 29.9      | 36.7          | 2.2        | 34.3       | 47.0   | 30      | 59*        | 2       | 32             | 77*                      | 26*       | 6           | 32*       | 16*        | 34*            | 195.5              | 1631                         |
| St George and Stapleton       | Staten Island | 29.7      | 34.7          | 2.1        | 35.5       | 48.6*  | 22      | 30         | 38      | 24             | 63*                      | 21        | 12          | 24        | 9          | 26             | 227.1*             | 1308                         |
| Highbridge and Concourse      | Bronx         | 29.0      | 37.5*         | 2.0        | 30.2       | 47.0   | 31*     | 65*        | 1       | 42             | 79*                      | 32*       | 13          | 34*       | 17*        | 42*            | 249.2*             | 2307*                        |
| Hunts Point and Longwood      | Bronx         | 28.6      | 39.4*         | 2.7*       | 29.0       | 47.8   | 21      | 76*        | 1       | 30             | 84*                      | 29*       | 14*         | 42*       | 20*        | 38*            | 261.6*             | 2709*                        |
| South Beach and Willowbrook   | Staten Island | 28.0      | 33.4          | 1.8        | 40.4*      | 48.0   | 3       | 14         | 68      | 27             | 60*                      | 14        | 4           | 25        | 6          | 27             | 168.3              | 958                          |
| Fordham and University        | Bronx         | 27.9      | 38.3*         | 1.8        | 29.8       | 47.3   | 27      | 69*        | 1       | 42             | 80*                      | 34*       | 14*         | 34*       | 16*        | 37*            | 241.2*             | 2573*                        |

\* Ranked among the highest 25% percentiles of all New York City Communities; †Rate of death before age 65 per 100,000 people (number of deaths); §per 100,000 adults.

‡ Data in race/ethnicity, education, foreign-born status, poverty, health insurance coverage, and health outcomes are from New York City Community Health Profiles 2018.

**Table 3. Rates of COVID-19 confirmed cases, positive tests, and deaths among New York City communities categorized by sociodemographic characteristics and health outcome measures.**

| Characteristics                           | Case rate, ‰ |       |       |       |                           | Positive test rate, % |      |      |      |                           | Death rate, ‰ |      |      |      |                           |
|-------------------------------------------|--------------|-------|-------|-------|---------------------------|-----------------------|------|------|------|---------------------------|---------------|------|------|------|---------------------------|
|                                           | Q1           | Q2    | Q3    | Q4    | <i>P</i> <sub>trend</sub> | Q1                    | Q2   | Q3   | Q4   | <i>P</i> <sub>trend</sub> | Q1            | Q2   | Q3   | Q4   | <i>P</i> <sub>trend</sub> |
| Median age                                | 23.20        | 22.18 | 23.23 | 20.16 | 0.45                      | 34.4                  | 35.0 | 35.4 | 31.0 | 0.07                      | 1.96          | 2.03 | 1.89 | 1.76 | 0.30                      |
| Male, %                                   | 21.40        | 23.82 | 21.20 | 22.45 | 0.07                      | 32.5                  | 35.5 | 34.2 | 33.6 | 0.24                      | 2.06          | 2.09 | 1.79 | 1.71 | <0.001                    |
| Black, %                                  | 18.75        | 20.35 | 25.58 | 24.94 | <0.01                     | 30.6                  | 33.2 | 35.3 | 37.3 | <0.001                    | 1.57          | 1.75 | 2.08 | 2.31 | <0.001                    |
| Hispanic, %                               | 19.61        | 19.88 | 22.42 | 27.50 | <0.001                    | 30.8                  | 33.6 | 34.4 | 37.2 | <0.01                     | 1.62          | 1.91 | 1.83 | 2.32 | <0.01                     |
| White, %                                  | 27.04        | 23.06 | 20.85 | 16.99 | <0.001                    | 37.6                  | 37.1 | 32.8 | 27.4 | <0.001                    | 2.30          | 2.09 | 1.86 | 1.31 | <0.001                    |
| Foreign born, %                           | 17.81        | 22.77 | 24.31 | 24.01 | 0.03                      | 28.5                  | 33.2 | 36.6 | 37.8 | <0.001                    | 1.48          | 1.96 | 1.98 | 2.24 | <0.01                     |
| College graduate, %                       | 27.67        | 24.37 | 20.59 | 13.84 | <0.001                    | 38.2                  | 35.3 | 32.9 | 25.9 | <0.001                    | 2.27          | 2.18 | 1.87 | 1.11 | <0.001                    |
| Poverty, %                                | 17.47        | 22.15 | 22.40 | 26.95 | <0.01                     | 28.4                  | 34.4 | 36.7 | 36.4 | <0.001                    | 1.32          | 1.94 | 2.17 | 2.22 | <0.001                    |
| Uninsured, %                              | 19.73        | 21.64 | 24.26 | 24.78 | 0.07                      | 30.3                  | 34.1 | 36.9 | 36.4 | <0.001                    | 1.52          | 1.99 | 2.10 | 2.17 | <0.01                     |
| Obesity, %                                | 17.13        | 23.12 | 24.73 | 25.60 | <0.001                    | 29.4                  | 34.8 | 36.2 | 36.1 | <0.001                    | 1.47          | 1.87 | 2.17 | 2.23 | <0.001                    |
| Diabetes, %                               | 18.34        | 19.25 | 28.29 | 27.71 | <0.001                    | 29.6                  | 32.9 | 39.3 | 37.3 | <0.001                    | 1.49          | 1.78 | 2.62 | 2.18 | <0.001                    |
| Hypertension, %                           | 15.53        | 22.24 | 25.26 | 27.98 | <0.001                    | 28.4                  | 33.5 | 36.9 | 37.4 | <0.001                    | 1.29          | 1.88 | 2.36 | 2.29 | <0.001                    |
| Premature death Avoidable hospitalization | 19.51        | 20.69 | 24.54 | 24.87 | <0.01                     | 32.4                  | 32.8 | 35.4 | 35.7 | 0.01                      | 1.67          | 1.68 | 2.15 | 2.23 | <0.001                    |
| Life expectancy                           | 15.85        | 24.14 | 24.10 | 24.34 | <0.01                     | 28.2                  | 34.9 | 35.9 | 35.8 | <0.01                     | 1.33          | 1.92 | 2.19 | 2.17 | <0.001                    |
|                                           | 25.24        | 23.60 | 20.18 | 20.21 | <0.01                     | 35.3                  | 34.5 | 34.8 | 31.8 | 0.05                      | 2.28          | 1.84 | 1.78 | 1.79 | <0.01                     |

\* Q1, Q2, Q3, Q4 denote communities in the first, second, third and fourth 25% of distributions of each respective character.

† Trend analyses were performed using Jonckheere-Terpstra tests.

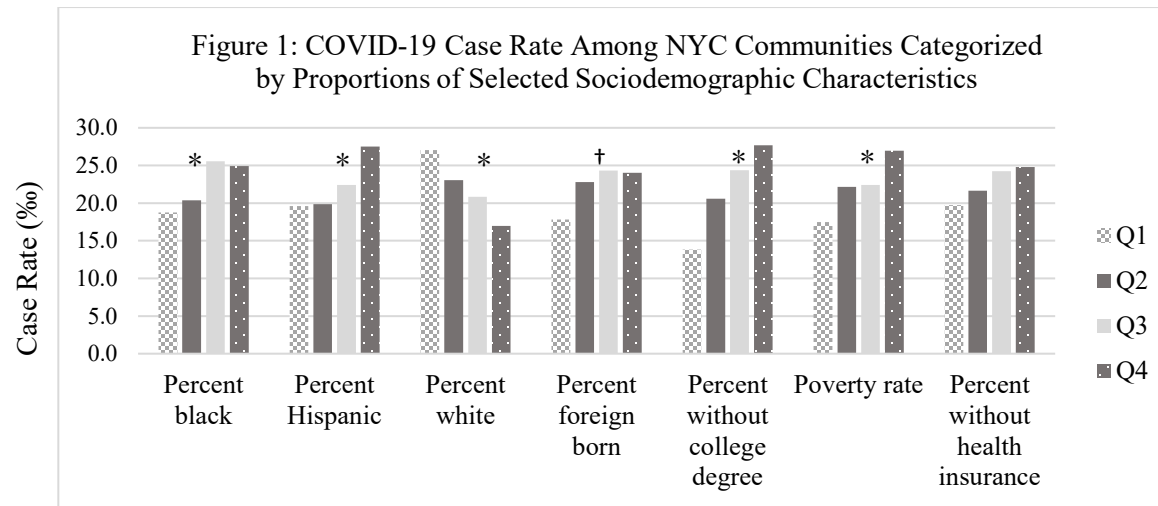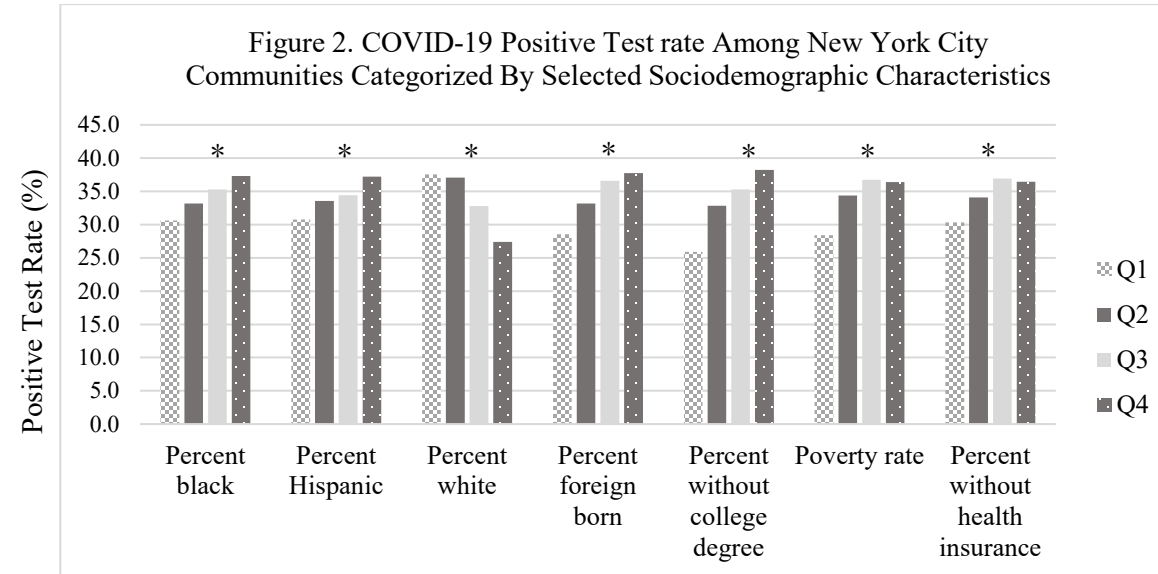

Supplement: 21550417-12-3379-s001.pdf [file 21550417-12-3379-s001.pdf]
